# Supplementary material for: A microfluidic, dual-purpose sensor for in vitro detection of Enterobacteriaceae and biotinylated antibodies
Source: Royal Society of Chemistry journal article supplement (doi:10.1039/c6lc00008h), 2016-01-01
Supplement: c6lc00008h1.pdf [file c6lc00008h1.pdf]

### Supplementary figures

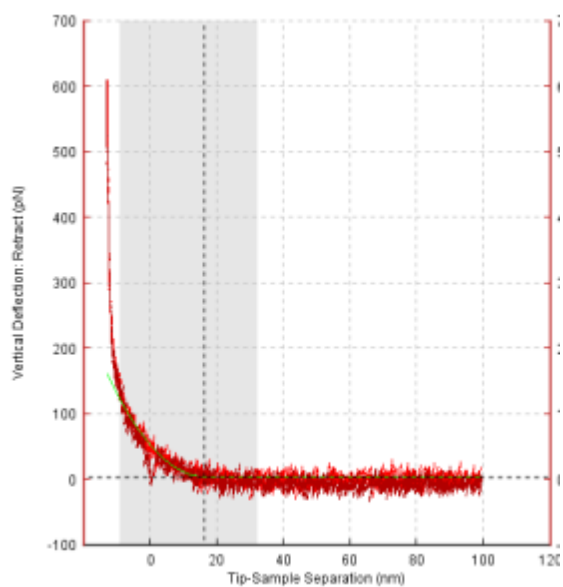

**Suppl. Figure 1:** Evaluation of the surface modification thickness from the vertical deflection versus the tip-sample separation in nm; thickness evaluated between 20 – 25 nm.

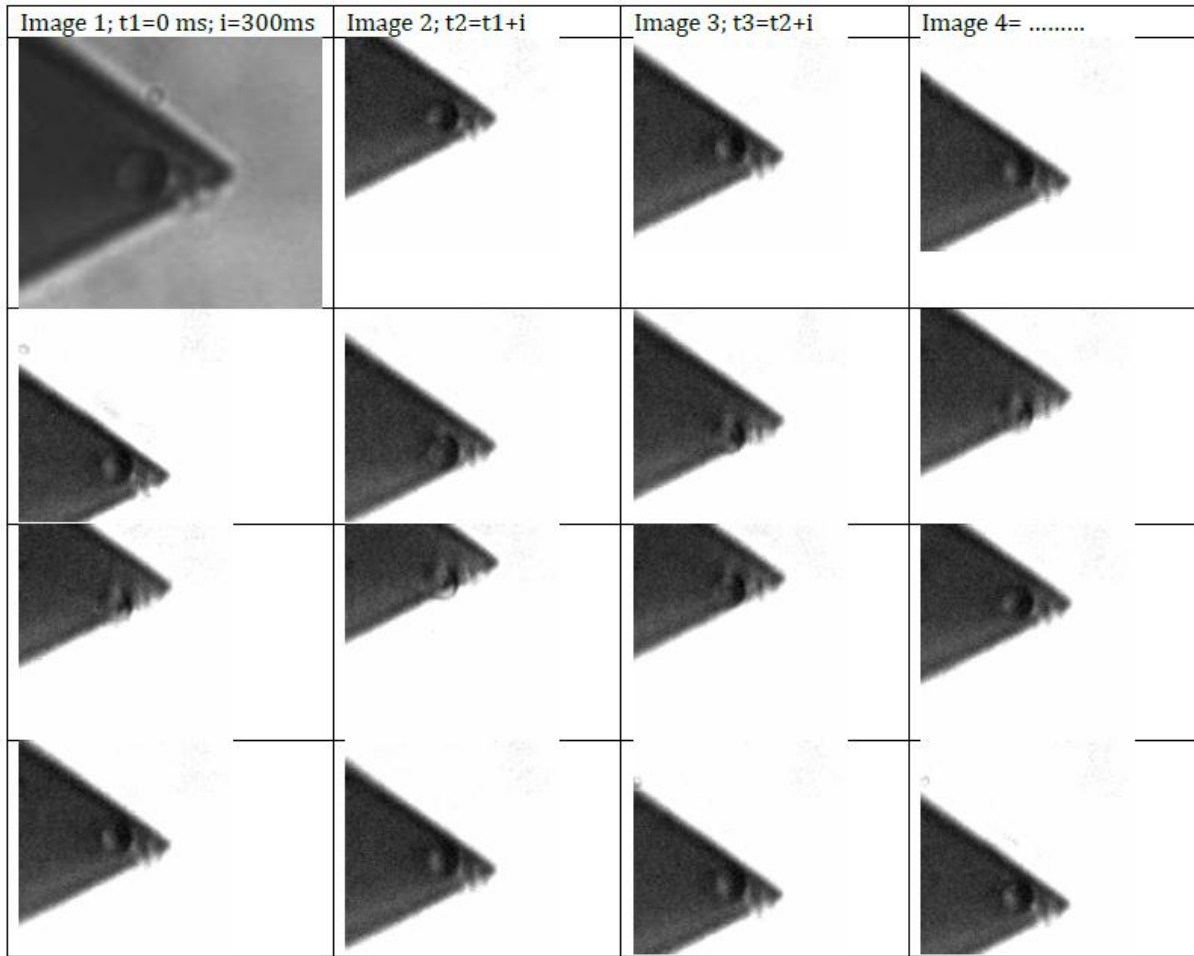

**Suppl. Figure 2:** Different instances of the AFM-tip during scan (tipless cantilever: nanoSensor): the tips were functionalized with APTES and a biotin-PEG-NHS crosslinker. The long crosslinker results to a drift of the MPs with respect to the tip during measurements, thus an alternative measurement scheme was used.
